# Supplementary material for: Electronic synergism of pyridinic- and graphitic-nitrogen on N-doped carbons for the oxygen reduction reaction
Source: Royal Society of Chemistry journal article supplement (doi:10.1039/c8sc04596h), 2018-12-13
Supplement: c8sc04596h1.pdf [file c8sc04596h1.pdf]

## Supporting Information

### Electronic Synergism of Pyridinic- and Graphitic-Nitrogen on N-doped Carbons for Oxygen Reduction Reaction

Xiaomei Ning <sup>a,b†</sup>, Yuhang Li <sup>a†</sup>, Jingyan Ming <sup>a</sup>, Qiang Wang <sup>c</sup>, Hongjuan Wang <sup>a</sup>,  
Yonghai Cao <sup>a</sup>, Feng Peng <sup>d</sup>, Yanhui Yang <sup>c</sup>, Hao Yu <sup>a\*</sup>

<sup>a</sup> *School of Chemistry and Chemical Engineering, Guangdong Provincial Key Lab of  
Green Chemical Product Technology, South China University of Technology,  
Guangzhou 510640, China*

<sup>b</sup> *School of Chemistry and Chemical Engineering, Lingnan Normal University,  
Zhanjiang 524048, China*

<sup>c</sup> *Institute of Advanced Synthesis, School of Chemistry and Molecular Engineering,  
Jiangsu National Synergetic Innovation Center for Advanced Materials, Nanjing Tech  
University, Nanjing 211816, China*

<sup>d</sup> *School of Chemistry and Chemical Engineering, Guangzhou University, Guangzhou,  
510006, China*

---

\* To whom correspondence should be addressed.

[yuhao@scut.edu.cn](mailto:yuhao@scut.edu.cn) (H Yu), Tel: +86 20 8711 4916, Fax: + 86 20 8711 4916.

† They contribute equally to this work.

**Table S1** Properties of the NCs investigated in this work.

| Sample             | S <sub>BET</sub>    | N/(C + N) | N <sub>P</sub> | N <sub>Py</sub> | N <sub>G</sub> | N <sub>ox</sub> | N <sub>ads</sub> | [N <sub>P</sub> ]:[N <sub>G</sub> ] |
|--------------------|---------------------|-----------|----------------|-----------------|----------------|-----------------|------------------|-------------------------------------|
|                    | (m <sub>2</sub> /g) | (%)       | (%)            | (%)             | (%)            | (%)             | (%)              |                                     |
| NCNTs(A-A)-900     | -                   | 3.14      | 0.78           | 0.07            | 1.61           | 0.38            | 0.30             | 0.48                                |
| NCNTs(X-N)-900     | -                   | 1.75      | 0.48           | 0.10            | 0.73           | 0.18            | 0.27             | 0.66                                |
| NCNTs(A-N)-900     | -                   | 2.46      | 0.86           | 0.03            | 1.03           | 0.24            | 0.31             | 0.83                                |
| NCNTs(A-N)-800     | -                   | 2.57      | 0.91           | 0.08            | 0.97           | 0.15            | 0.47             | 0.94                                |
| NCNTs(A-N)-1100    | -                   | 2.25      | 0.62           | 0.07            | 0.98           | 0.34            | 0.24             | 0.64                                |
| NG-800             | 705                 | 6.46      | 1.73           | 1.32            | 2.55           | 0.43            | 0.43             | 0.68                                |
| NG-900             | -                   | 4.07      | 1.21           | 0.80            | 1.53           | 0.33            | 0.20             | 0.79                                |
| N@CNTs(A-1.5)      | 78                  | 0.41      | 0.12           | 0.06            | 0.09           | 0.07            | 0.08             | 1.33                                |
| N@CNTs(A-2.5)      | 68                  | 4.75      | 1.49           | 0.21            | 2.15           | 0.52            | 0.38             | 0.69                                |
| N@CNTs(A-3.5)      | 64                  | 6.56      | 1.99           | 0.27            | 3.21           | 0.78            | 0.31             | 0.62                                |
| N@CNTs(A-4.5)      | 43                  | 7.41      | 2.09           | 0.23            | 3.81           | 0.83            | 0.45             | 0.55                                |
| N@CNTs(N-2.5)      | 78                  | 2.13      | 0.63           | 0.41            | 0.68           | 0.20            | 0.20             | 0.93                                |
| N@CNTs(A-2.5)-800  | 69                  | 4.51      | 1.24           | 0.27            | 2.07           | 0.59            | 0.33             | 0.60                                |
| N@CNTs(A-2.5)-900  | 72                  | 2.34      | 0.49           | 0.25            | 1.15           | 0.23            | 0.22             | 0.43                                |
| N@CNTs(A-2.5)-1100 | 75                  | 0.78      | 0.13           | 0.11            | 0.32           | 0.07            | 0.15             | 0.42                                |
| N@CNTs(N-2.5)-800  | 80                  | 1.04      | 0.26           | 0.27            | 0.29           | 0.12            | 0.09             | 0.90                                |
| N@CNTs(N-2.5)-1100 | 81                  | 0.47      | 0.12           | 0.10            | 0.14           | 0.06            | 0.04             | 0.84                                |
| N@RGO(A-2.5)       | 527                 | 5.53      | 1.30           | 0.36            | 3.00           | 0.68            | 0.20             | 0.43                                |
| N@RGO(N-2.5)       | 515                 | 5.24      | 1.92           | 0.74            | 1.77           | 0.50            | 0.33             | 1.08                                |

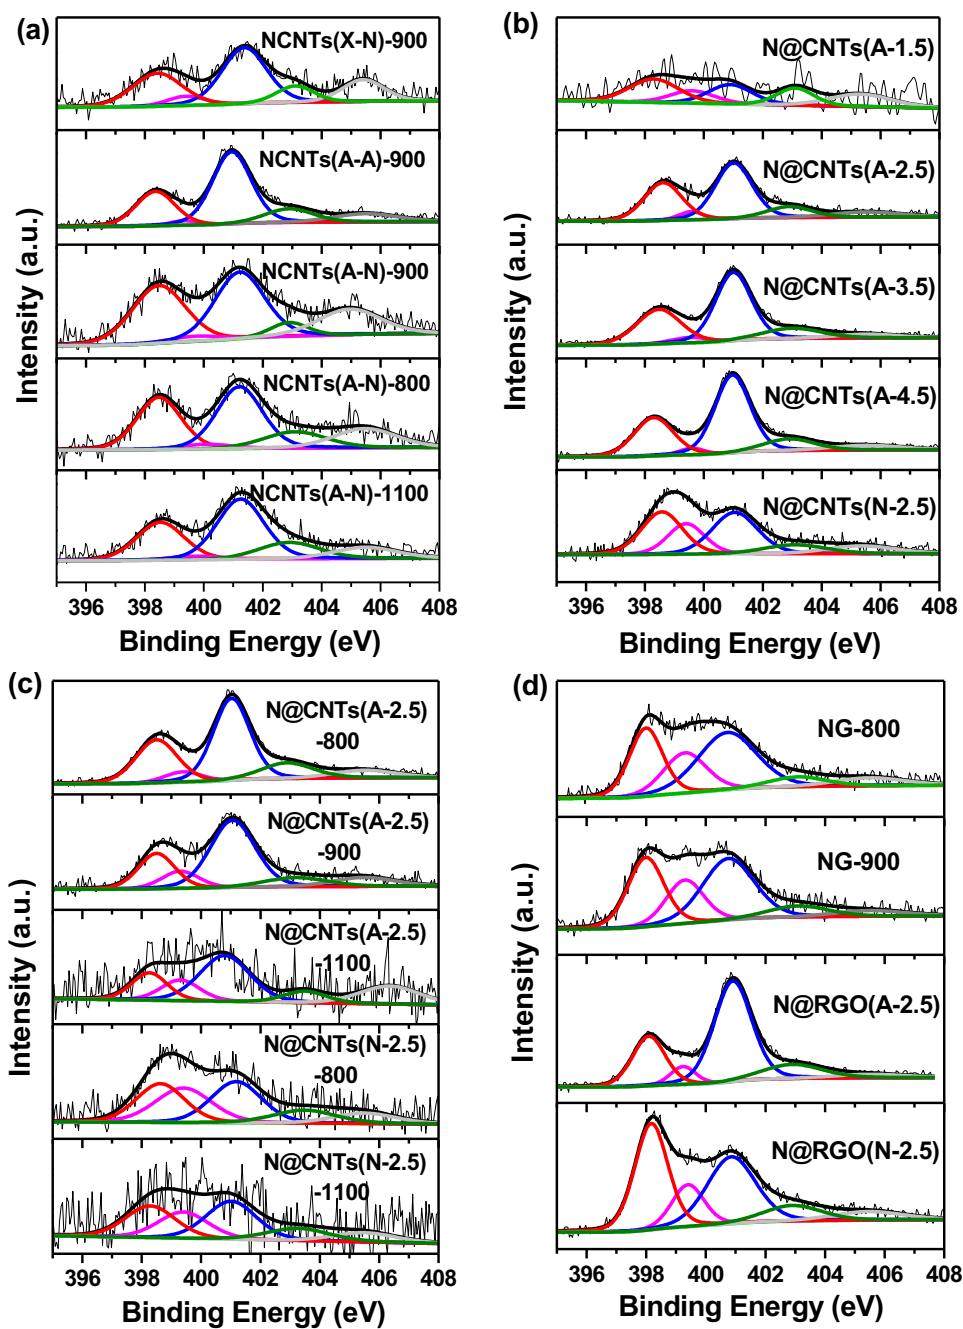

**Figure S1.** N<sub>1s</sub> XPS spectra of (a) NCNTs, (b) N@CNTs varying deposition time, (c) samples of N@CNTs(A-2.5) and N@CNTs(N-2.5) annealed at high temperatures, and (d) graphene-based samples, respectively.

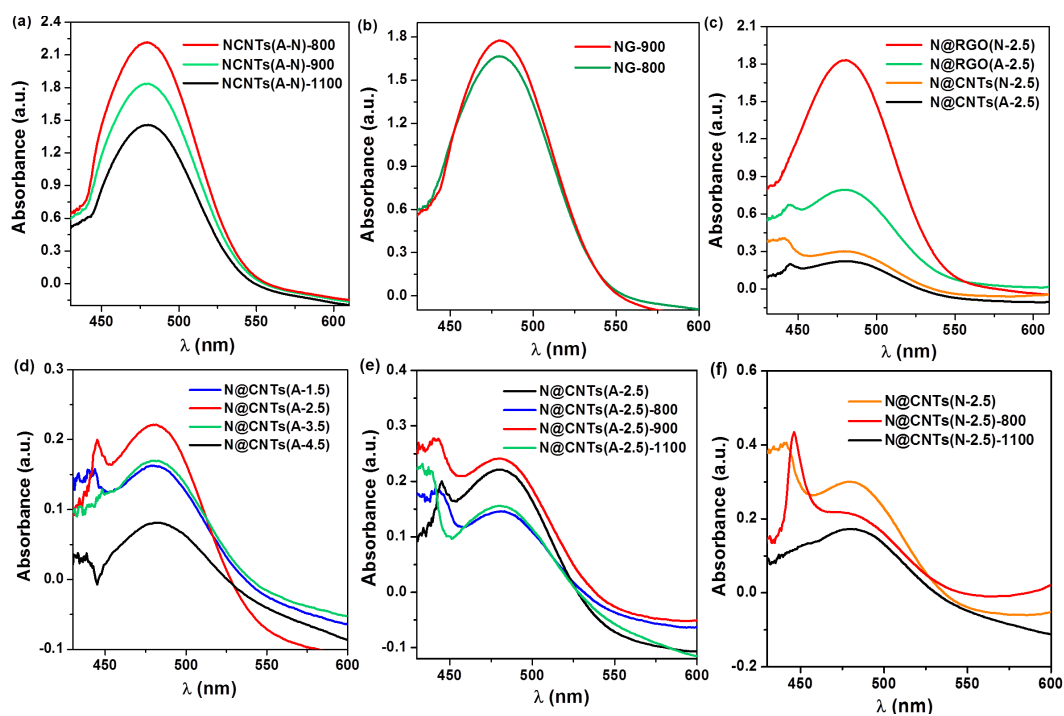

**Figure S2.** UV-Vis spectra of the TCNQ solutions in acetonitrile after reacted with N-doped carbon materials. In this work, we used the spectrum of TCNQ acetonitrile solution as reference. Since the TCNQ reference contains a certain amount of its radical anion ( $\text{TCNQ}^{\cdot-}$ ), the negative peak at ca. 450 nm signifies the less amount of  $\text{TCNQ}^{\cdot-}$  anions after reaction with carbon materials, probably due to the transformation of  $\text{TCNQ}^{\cdot-}$  anions to  $\text{TCNQ}^{2-}$  dianions through a one-electron transfer reaction.

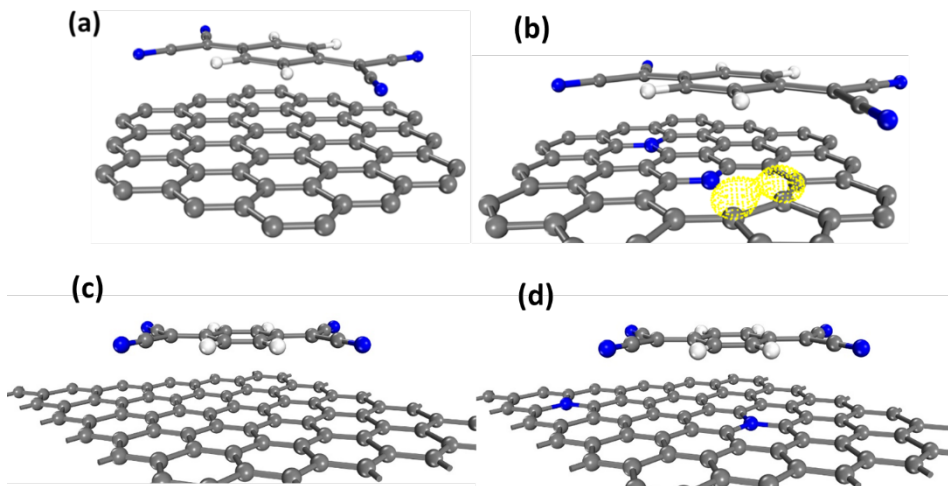

**Figure S3.** The optimized structures of (a) PG-TCNQ, (b) NG-TCNQ, (c) PG-TCNQ $\cdot^-$  and (d) NG-TCNQ $\cdot^-$ . The TCNQ molecule is adsorbed on the pristine graphene (PG-TCNQ) and nitrogen-doped graphene (NG-TCNQ) containing equal number of  $N_P$  and  $N_G$  atoms, respectively. For PG-TCNQ in the ground state, the Fermi level is -4.470 eV and the LUMO of TCNQ is -3.253 eV. For NG-TCNQ in the ground state, the Fermi level is -3.918 eV and the LUMO of TCNQ is -3.119 eV. After the identification of wavefunctions, it was found that the HOMO of NG-TCNQ is primarily contributed by the defect carbon atoms near the  $N_P$  atom, highlighted by the yellow zone in (b).

The adsorption energy of TCNQ on graphene (a) and N-doped graphene (b) are -0.881 and -1.795 eV, respectively, indicating the stronger adsorption on N-doped graphene. Meanwhile, the adsorption energy of TCNQ $\cdot^-$  on graphene (c) and N-doped graphene (d) are +0.645 and -0.139 eV, respectively. This result indicates that the anion cannot be stabilized on pristine graphene, but can be weakly adsorbed on N-doped graphene.

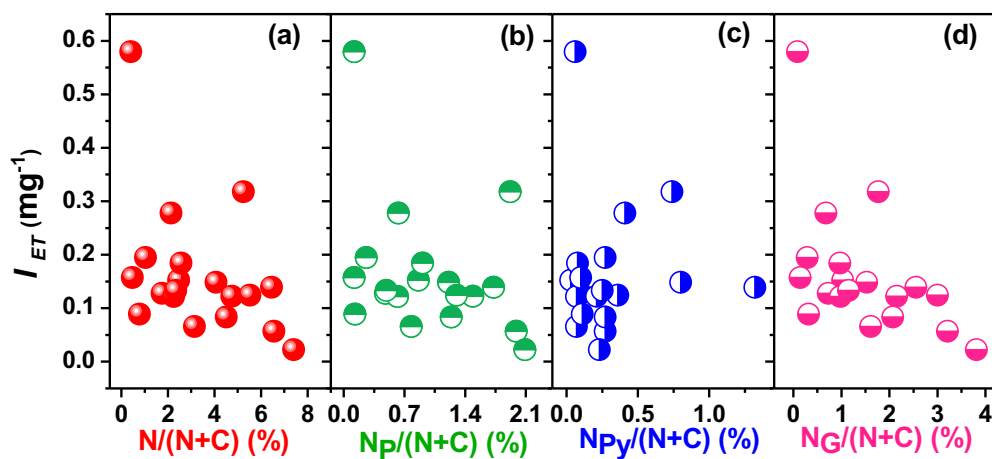

**Figure S4.** Dependences of the intensity of electron transfer on the content of (a)  $N/(N+C)$ , (b)  $N_P/(N+C)$ , (c)  $N_{Py}/(N+C)$ , and (d)  $N_G/(N+C)$  of N-doped carbons.

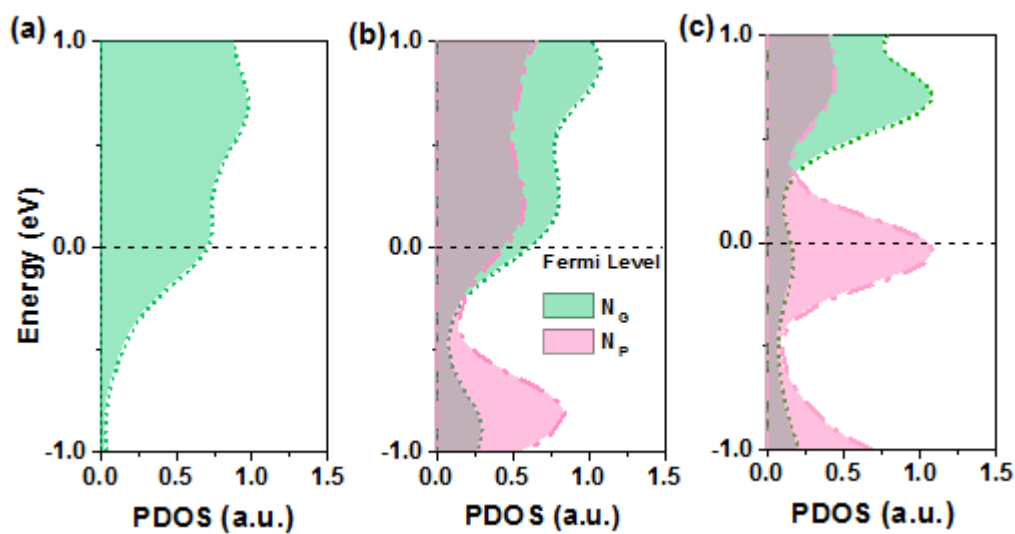

**Figure S5.** The partial density of states (PDOS) of  $N_G$  and  $N_P$  atoms for N-doped graphene (a) containing pure  $N_G$ , (b) with  $[N_P]:[N_G]=1:2$ , (c) with  $[N_P]:[N_G]=1:1$ , respectively.

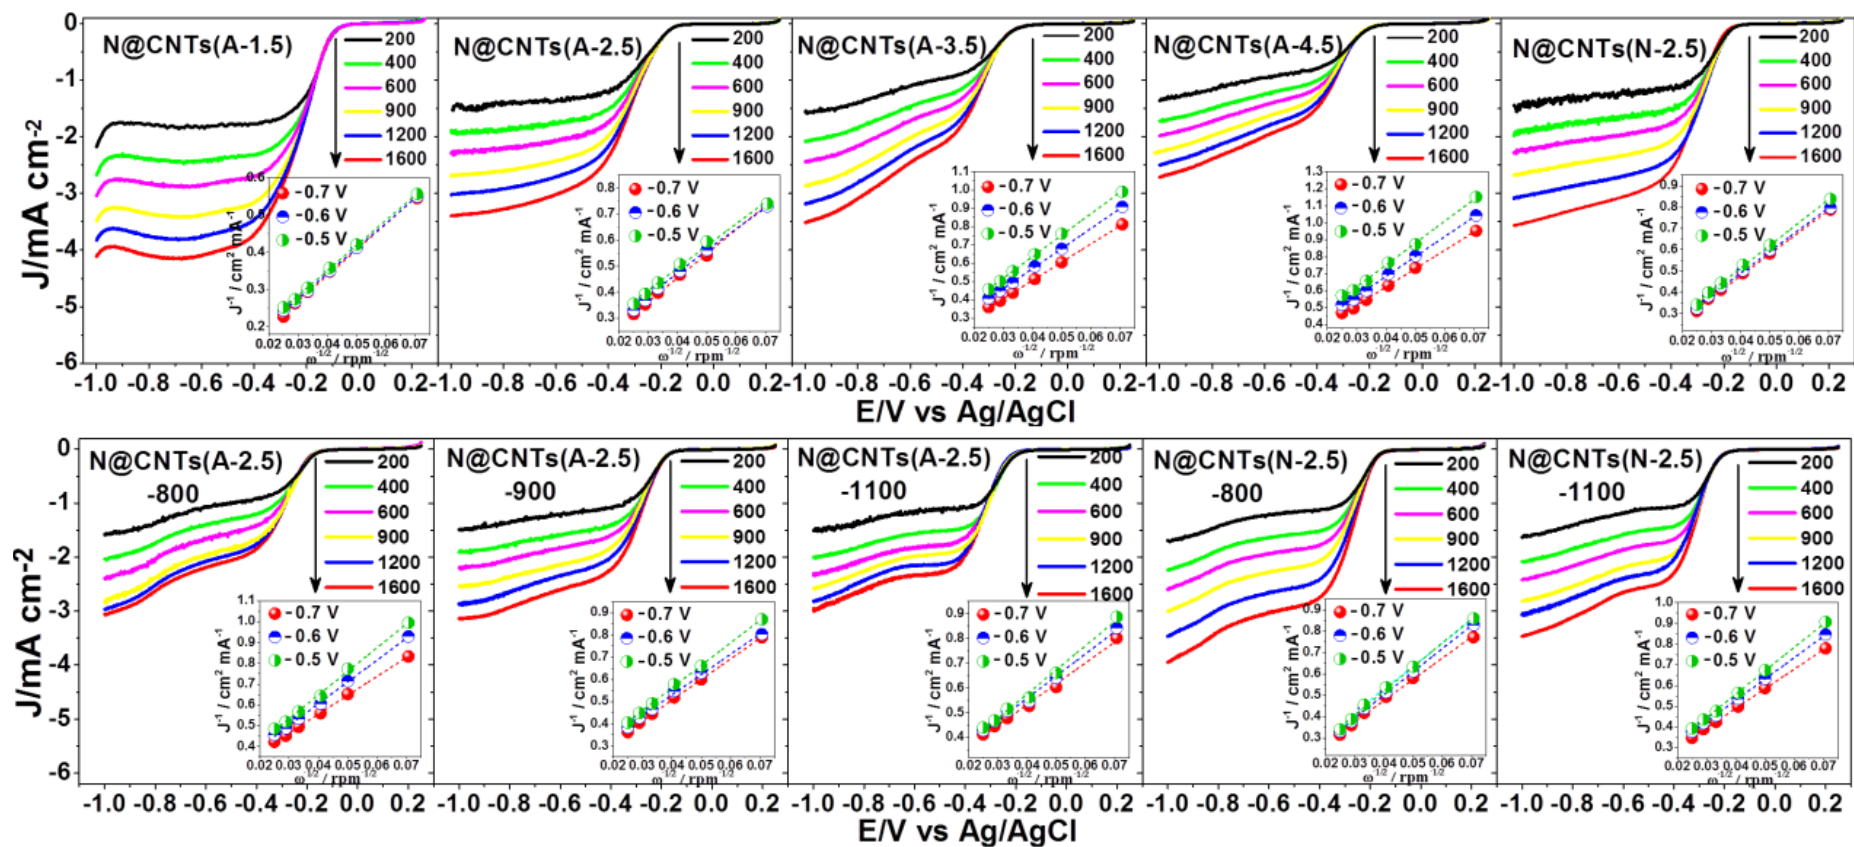

**Figure S6.** LSV polarization curves for ORR on N@CNTs with different rotation speeds. The insets show the corresponding K-L plots at -0.7 V, -0.6 V, -0.5 V.

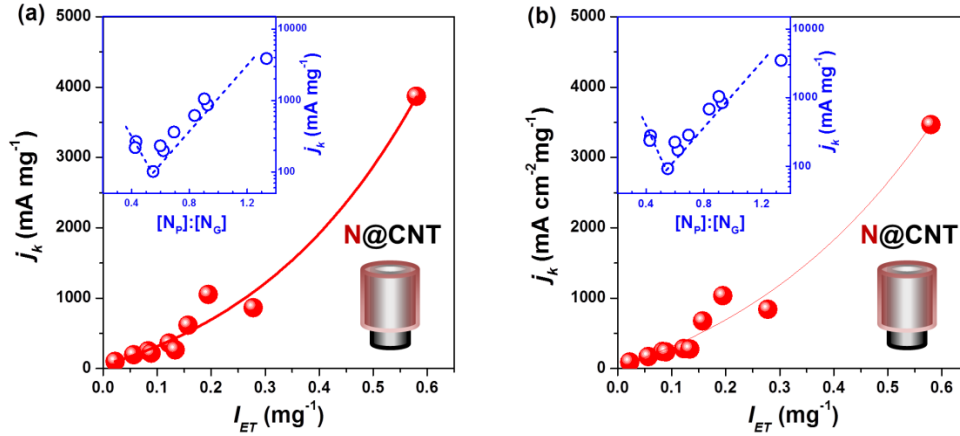

**Figure S7.** Dependences of kinetic current densities ( $j_k$ ) of ORR at (a) -0.6 V, and (b) -0.5 V vs Ag/AgCl on the intensity of electron transfer and  $[N_P]:[N_G]$  ratio (inset) of N@CNTs samples with a coaxial cable structure as shown at lower right panel.  $j_k$  was obtained according to the Koutecky-Levich (K-L) equation,  $j^{-1} = (0.62nFCD^{2/3}v^{-1/6}\omega^{1/2})^{-1} + j_k^{-1}$ , and normalized by the mass of NCs. Reaction conditions: the linear scan voltammetric tests for ORR were performed in  $O_2$ -saturated 0.1 M KOH from -1 V to 0.2 V at the scan rate of  $5 \text{ mV s}^{-1}$  under different rotation rates.

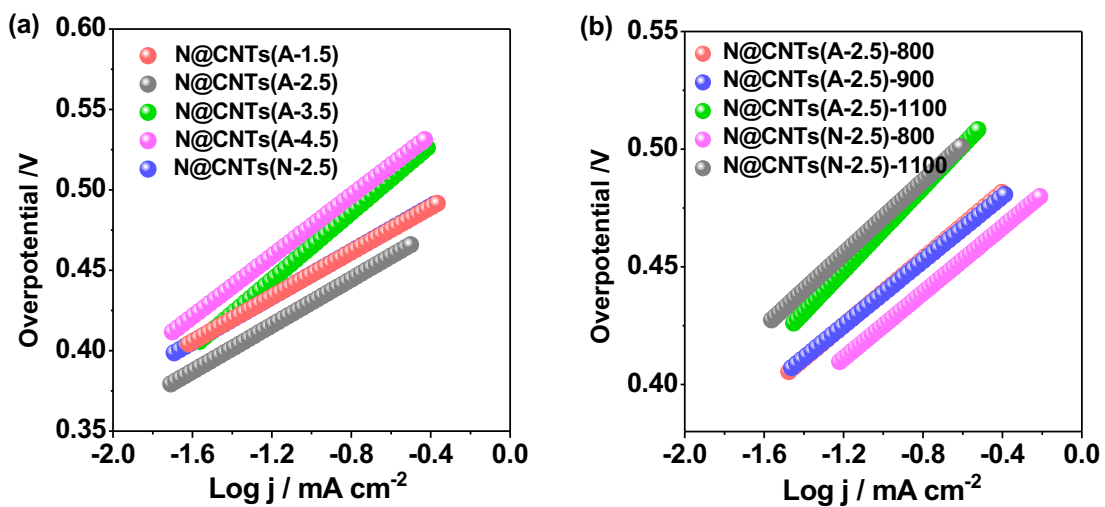

**Figure S8.** The Tafel curves of N@CNTs samples.



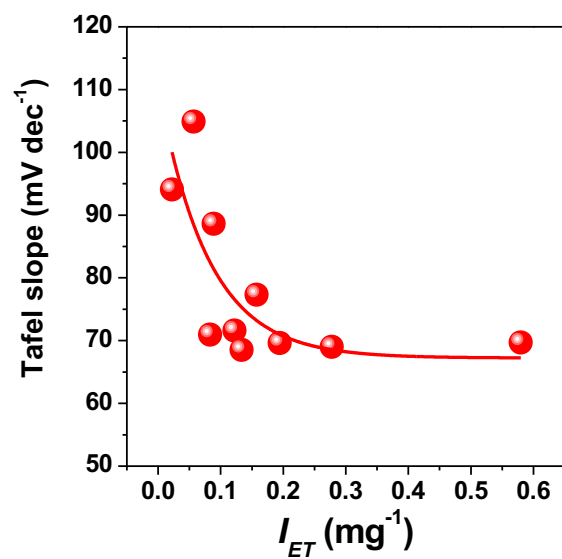

**Figure S9.** Dependence of Tafel slope on the intensity of electron transfer.

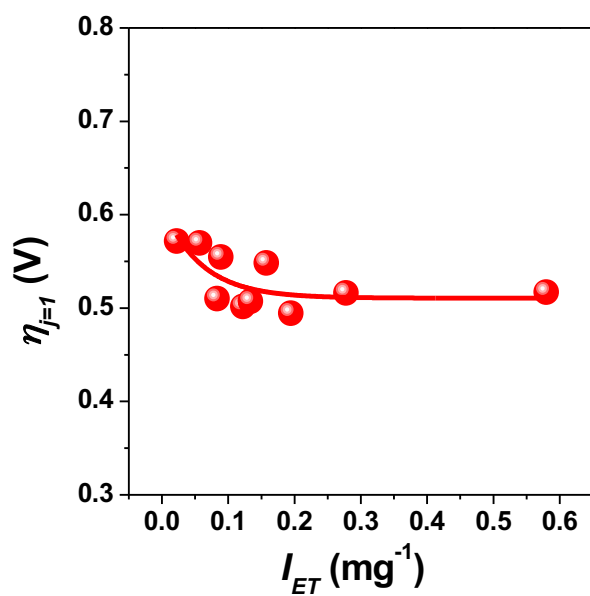

**Figure S10.** Dependence of overpotential at  $j=1$  on the intensity of electron transfer.

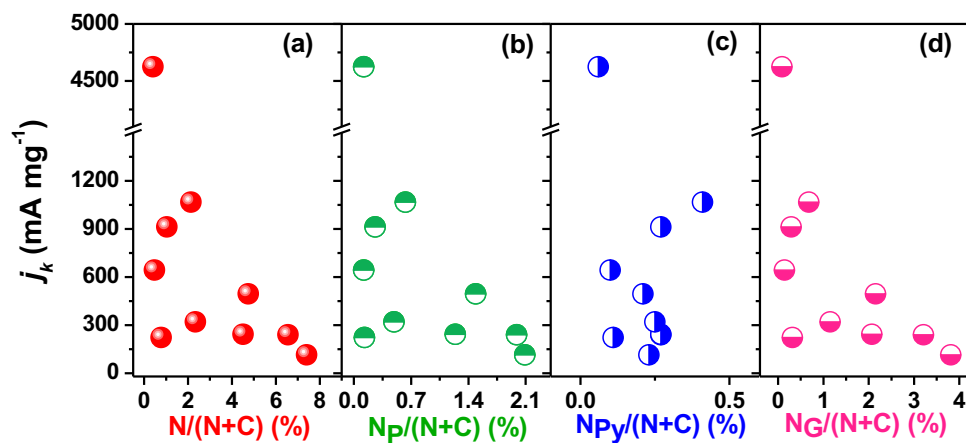

**Figure S11.** Dependence of kinetic current densities ( $j_k$ ) of ORR at - 0.7 V on the content of (a)  $N/(N+C)$ , (b)  $N_p/(N+C)$ , (c)  $N_{Py}/(N+C)$ , and (d)  $N_G/(N+C)$  of N-doped carbons.
